# Supplementary material for: Self-Penetrating Oligonucleotide Derivatives: Features of Self-Assembly and Interactions with Serum and Intracellular Proteins
Source: MDPI journal article supplement (doi:10.3390/pharmaceutics15122779), 2023-12-14
Supplement: s1 [file s1]

# Supplementary Materials

## Self-Penetrating Oligonucleotide Derivatives: Features of Self-Assembly and Interactions with Serum and Intracellular Proteins

Irina Bauer, Ekaterina Ilina, Timofey Zharkov, Evgeniya Grigorieva, Olga Chinak, Maxim Kupryushkin, Victor Golyshev, Dmitry Mitin, Alexey Chubarov \*, Svetlana Khodyreva and Elena Dmitrienko \*

|                                                                                                                 |           |
|-----------------------------------------------------------------------------------------------------------------|-----------|
| <b>S1. Result of mass-spectrometry of modified oligonucleotides</b>                                             | <b>2</b>  |
| <b>S2. Duplex thermal denaturation experiments</b>                                                              | <b>4</b>  |
| <b>S3. Critical aggregation concentration determination by Nile red encapsulation assay</b>                     | <b>5</b>  |
| <b>S4. Dynamic light scattering measurements</b>                                                                | <b>7</b>  |
| <b>S5. Possible secondary structures formed by oligonucleotides under study</b>                                 | <b>7</b>  |
| <b>S6. Kd determination by fluorescence titration experiment</b>                                                | <b>8</b>  |
| <b>S7. Affinity modification of Ku antigen, PARP1 and DNA polymerase <math>\beta</math> by [32P]5'-dRp-DNAs</b> | <b>8</b>  |
| <b>S8. Electrophoretic analysis of Ku antigen, PARP1, and DNA polymerase <math>\beta</math></b>                 | <b>9</b>  |
| <b>S9. Cross-linking of [32P]-dRp-containing DNAs to PARP1 and HSA</b>                                          | <b>9</b>  |
| <b>S10. Oligonucleotide cytotoxicity studies</b>                                                                | <b>10</b> |
| <b>S11. Penetration of HSA and its complexes with TZD16 and TZD30 oligomers into cells</b>                      | <b>10</b> |

## S1. Result of mass-spectrometry of modified oligonucleotides

**TZ30** 5'- TCC-TGA-CAT-ACT-TGA-TAC-TTA-GAC-ATT-CT\***T** -3'

Mr [calculated] / Mr [found] = 9546.0 / 9547.3

| Ion charge | Calculated | Found  |
|------------|------------|--------|
| -7         | 1362.71    | 1362.9 |
| -8         | 1192.25    | 1192.4 |
| -9         | 1059.67    | 1059.9 |
| -10        | 953.60     | 953.8  |
| -11        | 866.82     | 867.0  |
| -12        | 794.50     | 794.6  |
| -13        | 733.31     | 733.4  |
| -14        | 680.86     | 680.9  |
| -15        | 635.40     | 635.4  |

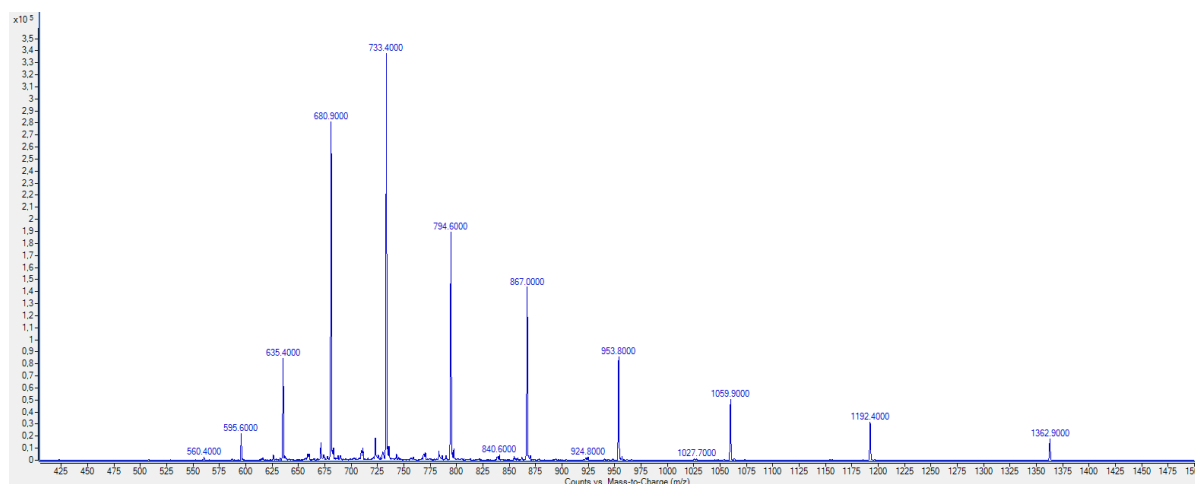

**FAM-TZ16** 5'-[FAM]CTGACTATGAAGTAT\***T**-3'

Mr [calculated] / Mr [found] = 5877.5 / 5876.5

| Ion charge | Calculated | Found   |
|------------|------------|---------|
| -4         | 1468.38    | 1468.35 |
| -5         | 1174.50    | 1174.28 |
| -6         | 978.58     | 978.35  |
| -7         | 838.64     | 838.35  |

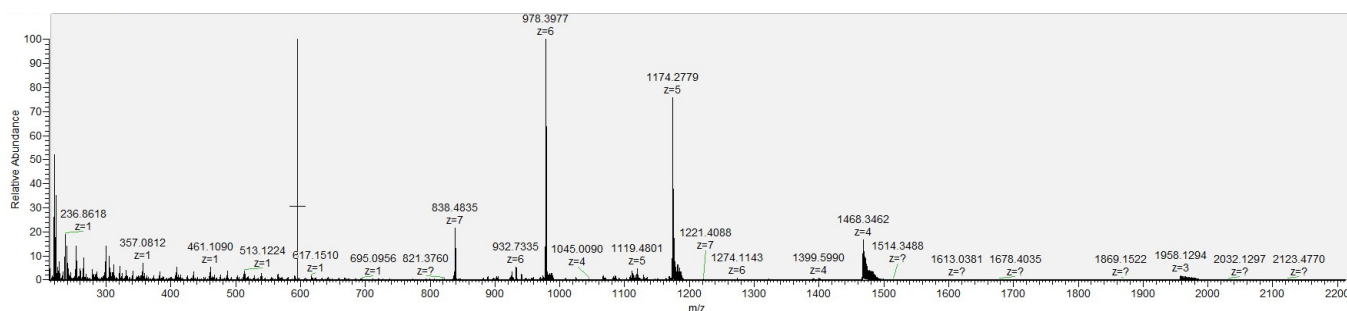

**FAM-TZ17** 5'-[FAM]AGTCTCGACTTGCTAT\***T**-3'

Mr [calculated] / Mr [found] = 6130.4 / 6132.0

| Ion charge | Calculated | Found  |
|------------|------------|--------|
| -5         | 1225.08    | 1225.3 |
| -6         | 1020.73    | 1020.9 |
| -7         | 874.77     | 874.9  |
| -8         | 765.30     | 765.3  |
| -9         | 680.16     | 680.1  |
| -10        | 612.04     | 612.0  |
| -11        | 556.31     | 556.2  |

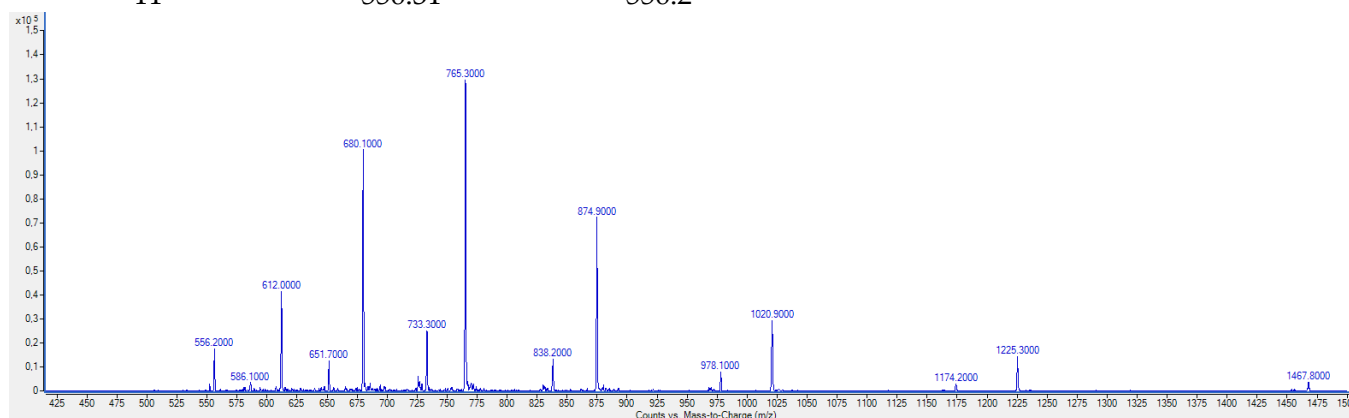

**Figure S1.** Result of mass-spectrometry of modified oligonucleotides TZ30, FAM-TZ16 and FAM-TZ17.

## S2. Duplex thermal denaturation experiments

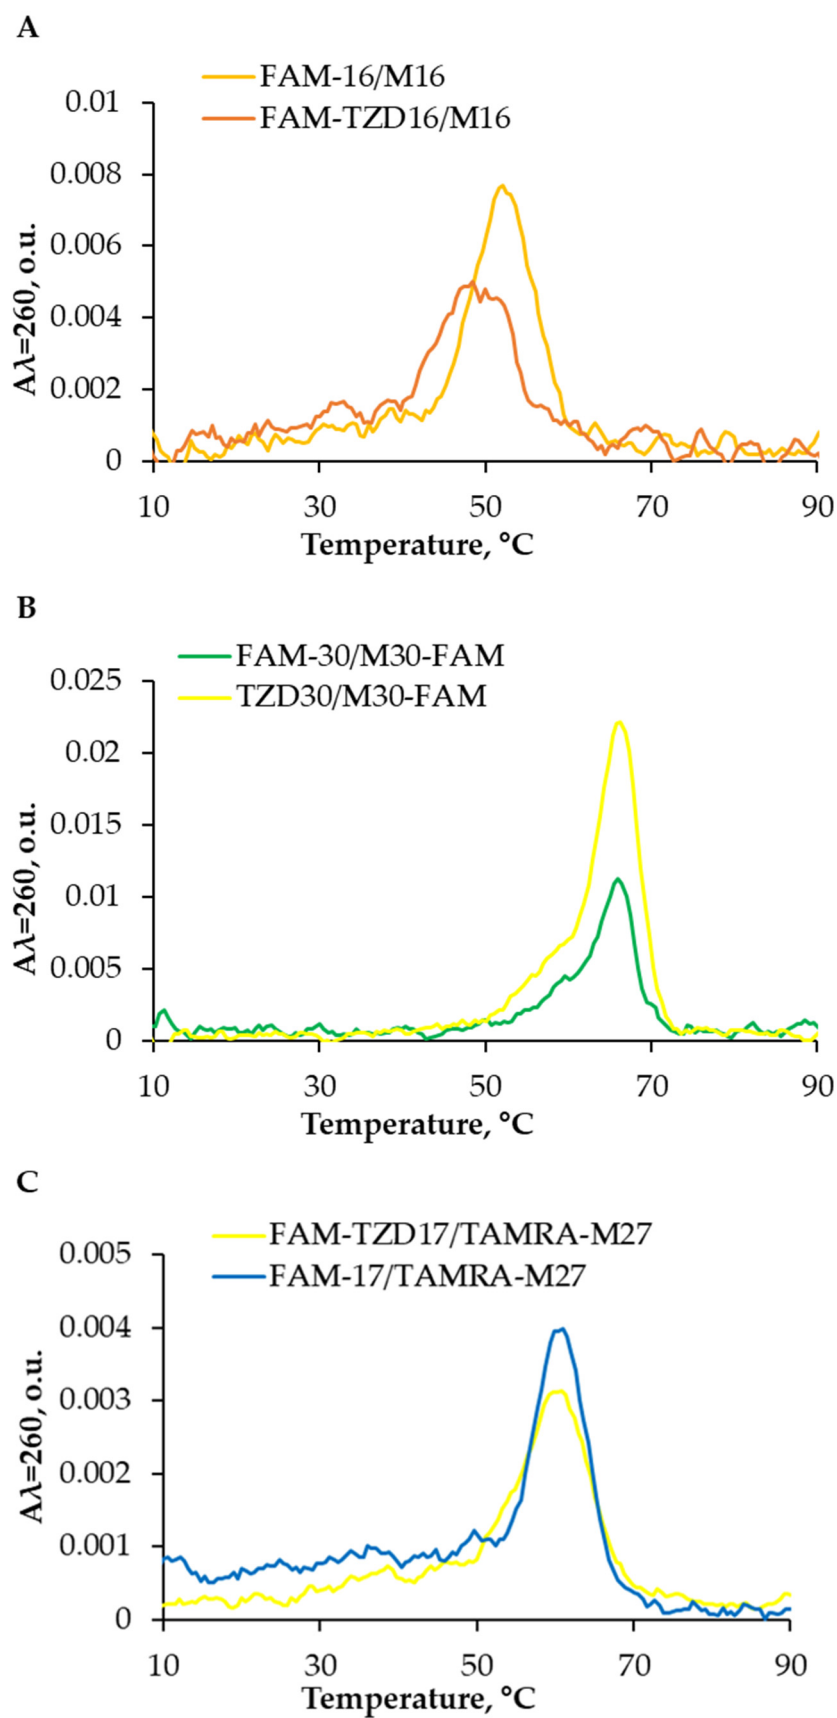

**Figure S2.** (A–C) Differential melting curves of the duplexes under study; each sample contained 5  $\mu\text{M}$  of a complementary strand in 10 mM NaCac, pH 7.0, and 100 mM NaCl.

### S3. Critical aggregation concentration determination by Nile red encapsulation assay

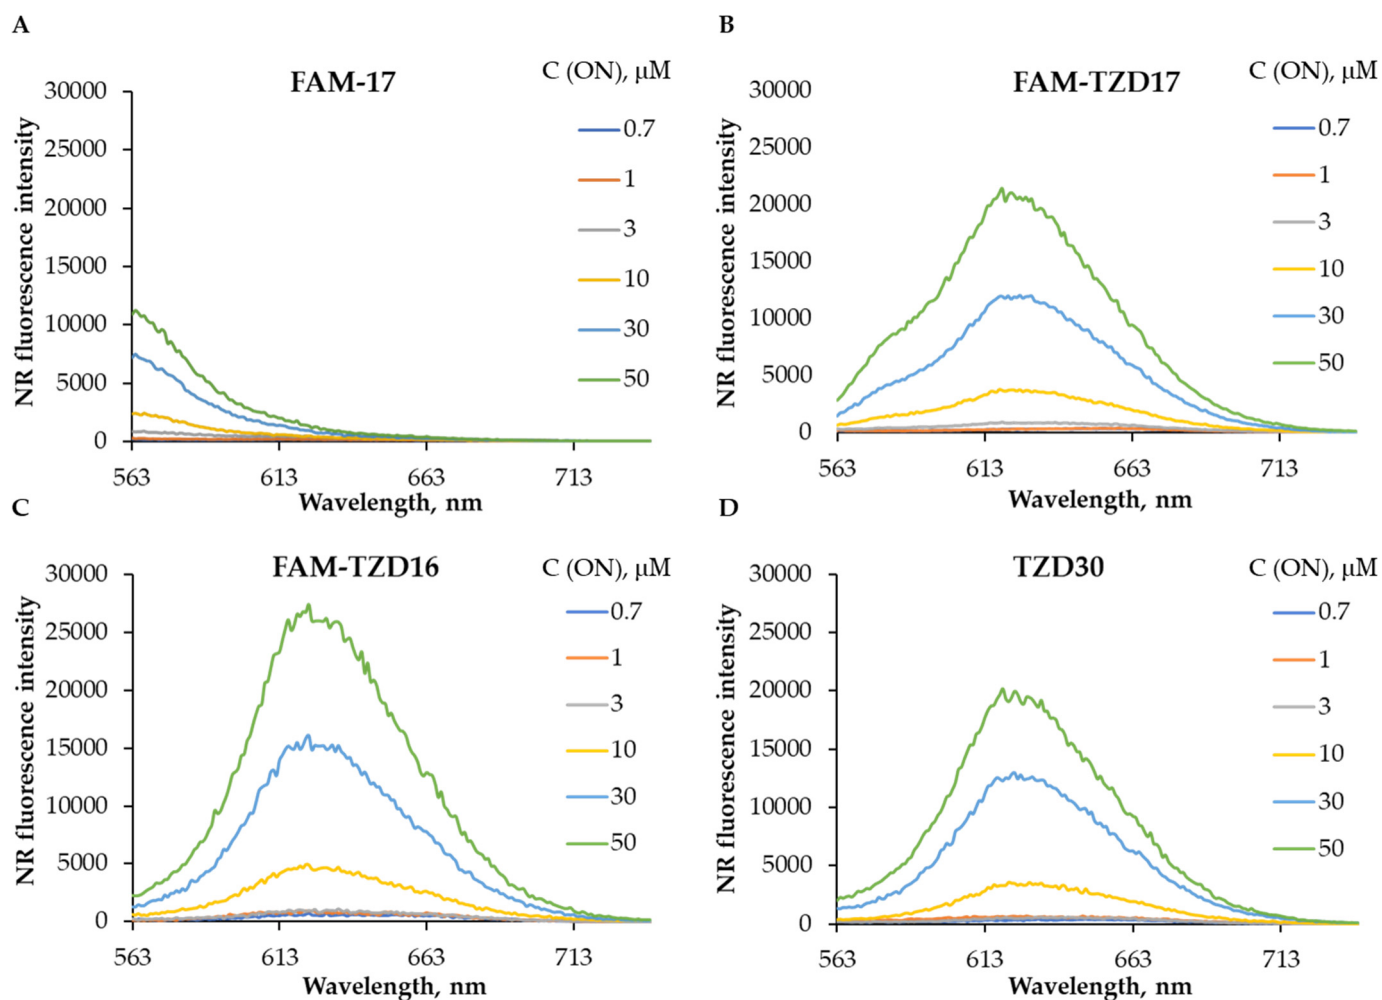

**Figure S3.** (A–D) Nile Red fluorescence emission spectra in solutions (TAM buffer) of indicated concentrations of oligonucleotides under study.

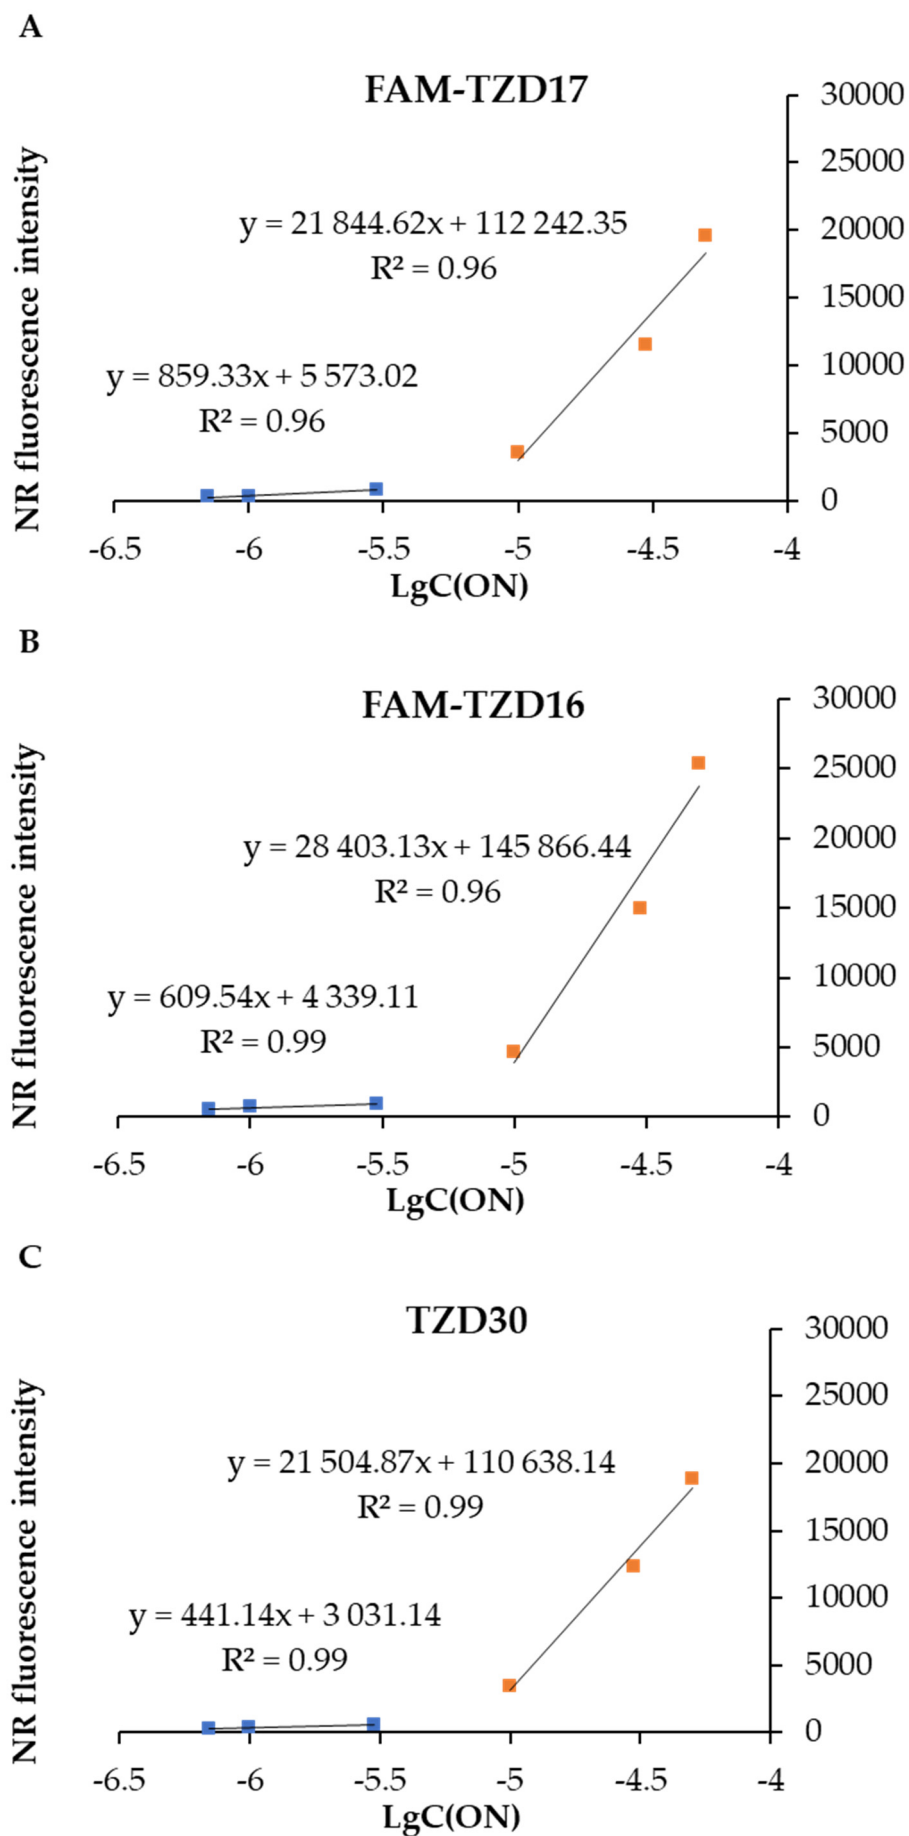

**Figure S4.** (A–C) Dependence of the Nile Red emission intensity at 630 nm on the logarithm of oligonucleotide concentration (M).

## S4. Dynamic light scattering measurements

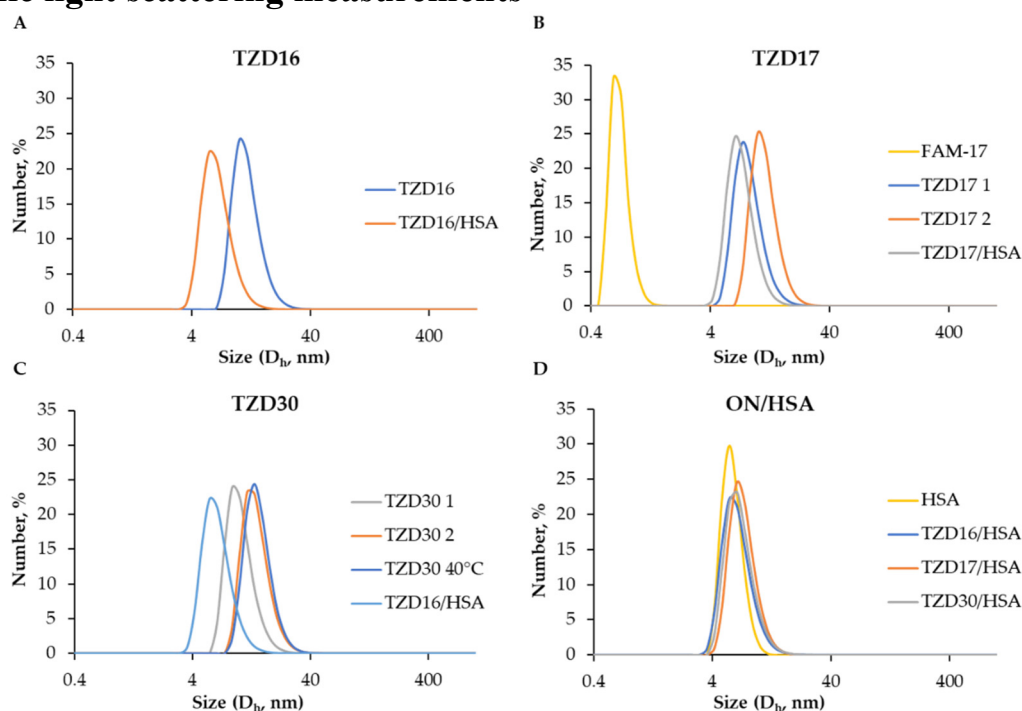

**Figure S5.** (A–D) Size distribution by number of oligonucleotide particles and HSA–oligonucleotide associates after 12 h incubation in TAM as measured using DLS; oligonucleotide samples contained 10  $\mu$ M oligomer; ON/HSA ratio in the respective samples is 1:1.

## S5. Possible secondary structures formed by oligonucleotides under study

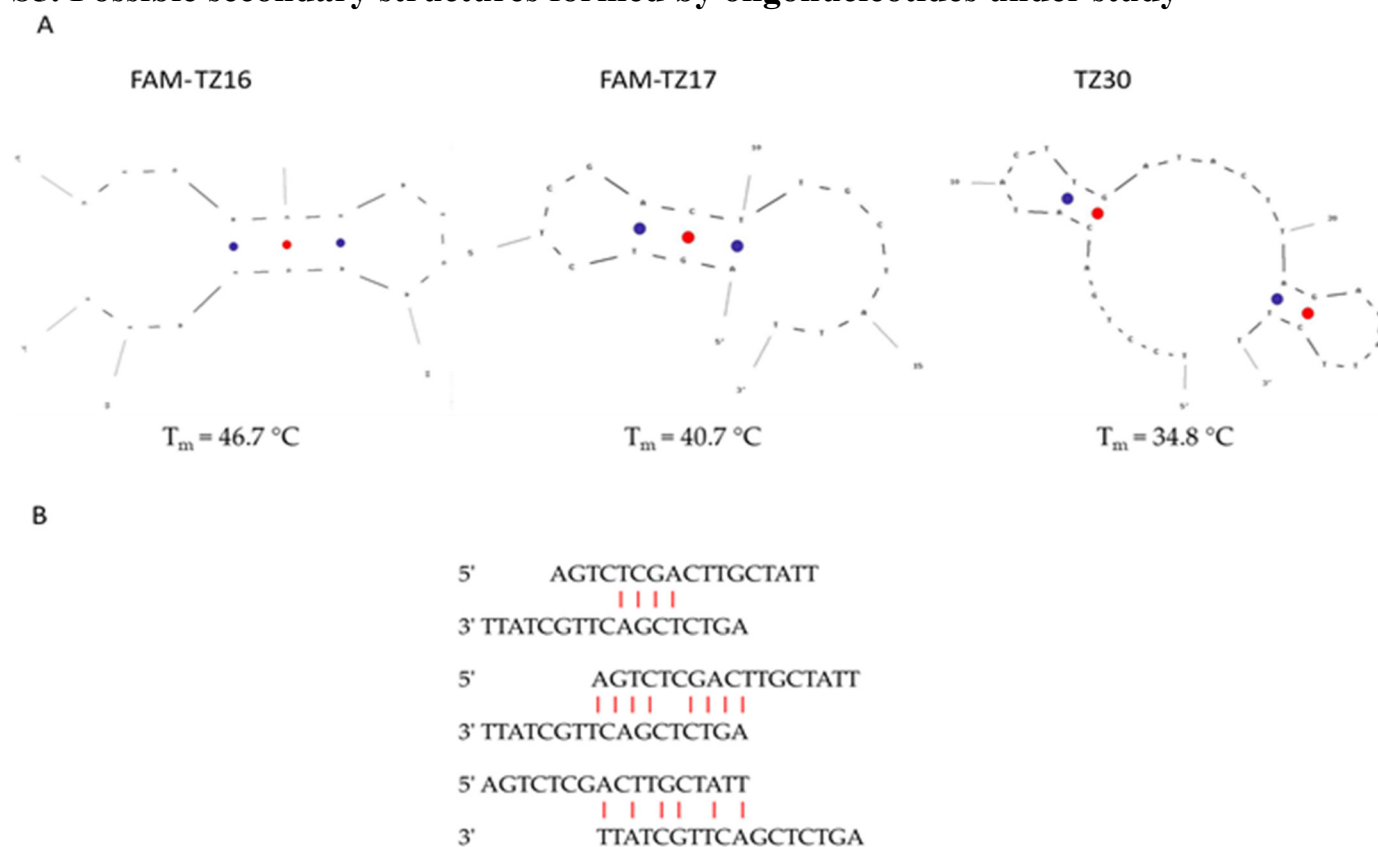

**Figure S6.** Secondary structures and calculated melting temperatures were predicted using the OligoAnalyzer software lacking the triazinyl phosphoramidate modification (A) and possible structures of FAM-TZ17 self-dimers (B).

## S6. Kd determination by fluorescence titration experiment

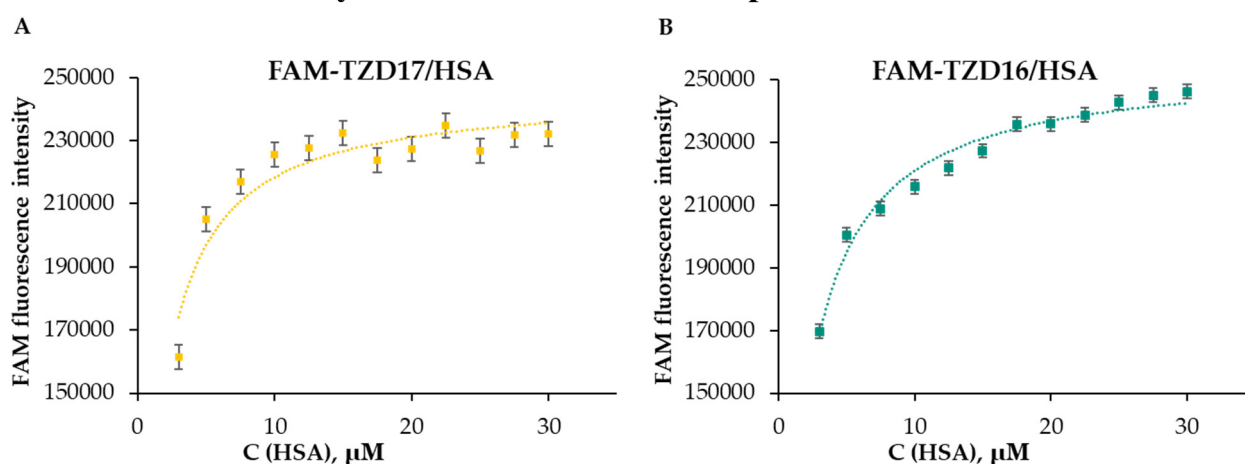

**Figure S7.** (A,B) Binding curves for the complexes FAM-TZ17/HSA and FAM-TZ16/HSA after 30 min of incubation in PBS buffer, at 37 °C; each sample contained 10 μM oligomer.

## S7. Affinity modification of Ku antigen, PARP1 and DNA polymerase β by [<sup>32</sup>P]5'-dRp-DNAs

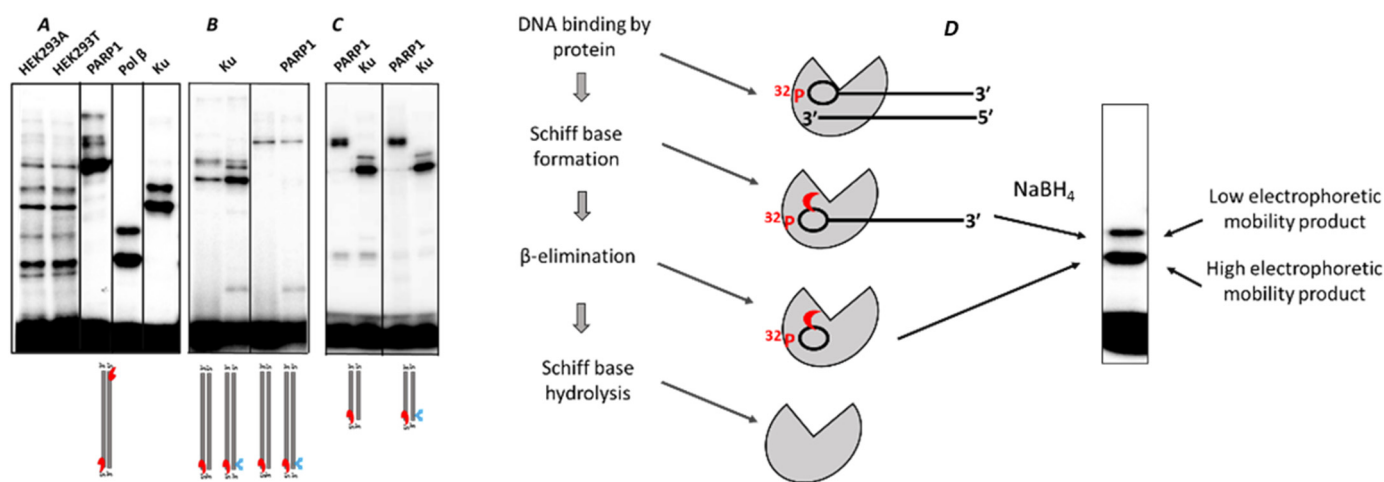

**Figure S8.** Affinity modification of Ku antigen, PARP1, and DNA polymerase β by [<sup>32</sup>P]5'-dRp-DNAs. (A)—modification of proteins by the DNA-duplex composed from two 30-mer oligonucleotides bearing a [<sup>32</sup>P]5'-dRp group at each chain. All reaction mixtures contained 100 nM 5'-dRp-DNA and proteins of whole-cell extracts, 1 mg/ml, or 30 nM Ku antigen, or 150 nM PARP1, or 50 nM DNA polymerase β. The reaction mixtures were incubated at 37 °C for 5 min followed by borohydride treatment for 30 min at 0 °C. The products of DNA–protein cross-linking were separated in 7.5% PAAG according to [97]. (B)—modification of 20 nM Ku antigen, 20 nM PARP1 by 30-mer DNA duplexes. The reaction mixtures were incubated at 37 °C for 10 min followed by borohydride treatment for 30 min at 0 °C. The products of DNA–protein cross-linking were separated in 10% PAAG according to [97]. (C)—modification of 50 nM Ku antigen, 50 nM PARP1 by 16-mer DNA duplexes containing [<sup>32</sup>P]5'-dRp-oligonucleotide and non-modified or TZD-modified oligonucleotides. The reaction mixtures were incubated at 37 °C for 10 min followed by borohydride treatment for 30 min at 0 °C. The products of DNA–protein cross-linking were separated in 12.5% PAAG. The gels were dried and exposed to a phosphor imaging screen. Positions of the [<sup>32</sup>P]5'-dRp group and TZD-modification are shown by red and blue symbols, respectively. (D)—Scheme of [<sup>32</sup>P]5'-dRp DNA cross-linking to protein and release from covalent complex with protein. The products to be analyzed by SDS-PAAGE were obtained by sodium borohydride treatment of the reaction products.



## S8. Electrophoretic analysis of Ku antigen, PARP1, and DNA polymerase $\beta$

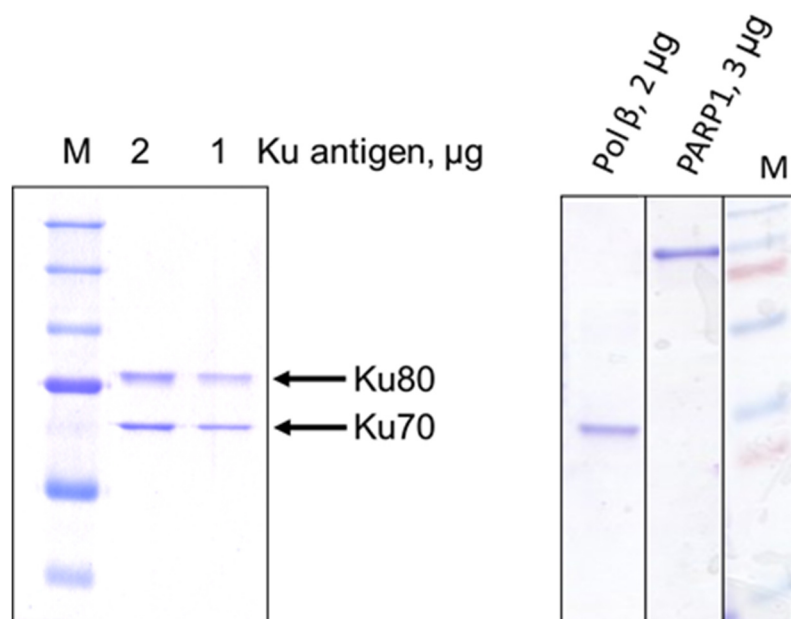

**Figure S9.** Electrophoretic analysis of used proteins. Purified proteins were analyzed by SDS-PAGE according to the Laemmli method. The gels were 7.5% for Ku antigen and 12.5% for other proteins. The gels were stained with Coomassie R250.

## S9. Cross-linking of [ $^{32}\text{P}$ ]-dRp-containing DNAs to PARP1 and HSA

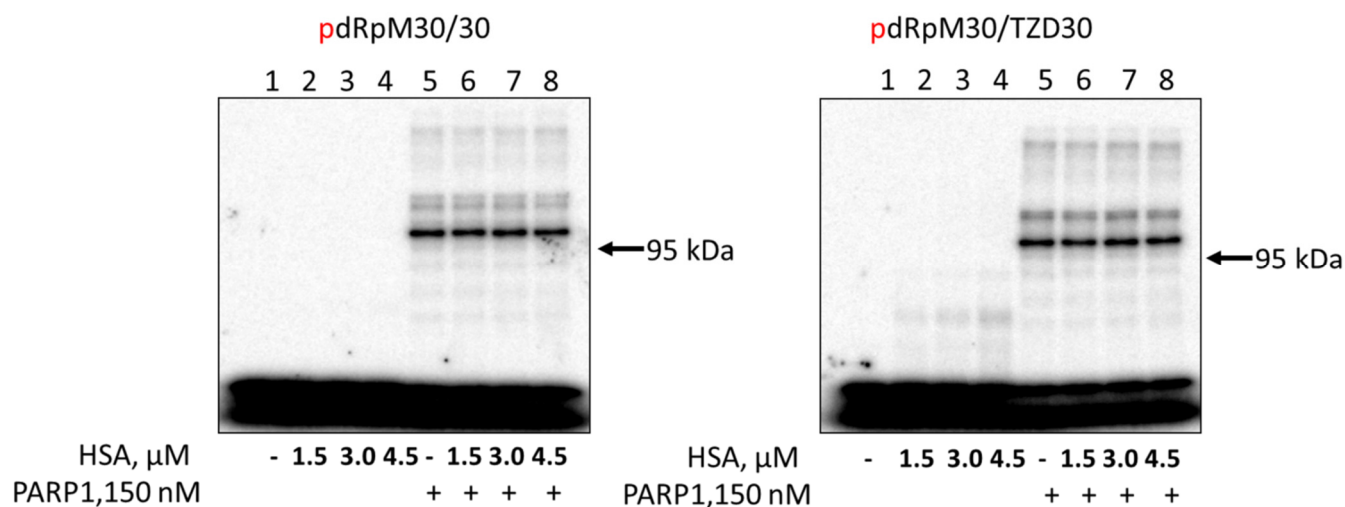

**Figure S10.** Cross-linking of [ $^{32}\text{P}$ ]-dRp-containing DNAs to PARP1 and HSA. 100 nM [ $^{32}\text{P}$ ]-dRp-containing DNAs were incubated at 37°C for 10 min with 1.5  $\mu\text{M}$  HSA (lanes 2), 3.0  $\mu\text{M}$  HSA (lanes 3), 4.5  $\mu\text{M}$  HSA (lanes 4), 150 nM PARP1 (lanes 5), 150 nM PARP1+ 1.5  $\mu\text{M}$  HSA (lanes 6), 150 nM PARP1+ 3.0  $\mu\text{M}$  HSA (lanes 7), and 150 nM PARP1+ 4.5  $\mu\text{M}$  HSA (lanes 8). Lanes 1—DNA, control without protein(s). After incubation, the reaction mixtures were supplemented with 20 mM sodium borohydride to reduce the Schiff base for 30 min at 0 °C. The products were resolved in 7.5% SDS-PAAG according to the Laemmli method. The gels were dried and exposed to a phosphor imaging screen. The type of DNA is indicated above the autoradiograph.

## S10. Oligonucleotide cytotoxicity studies

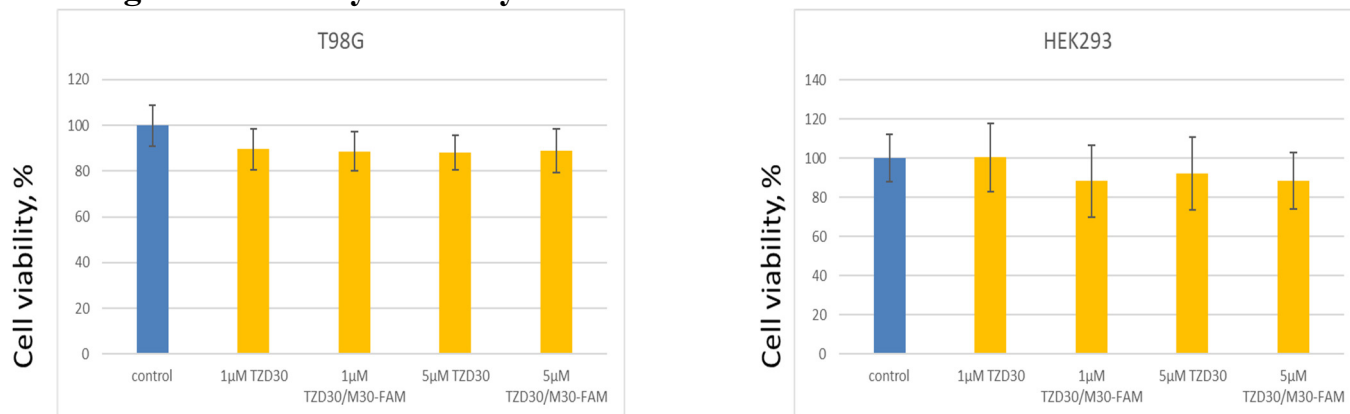

**Figure S11.** MTT test results for TZD30 and TZD30/M30-FAM on HEK293 and T98G cell lines.

## S11. Penetration of HSA and its complexes with TZD16 and TZD30 oligomers into cells

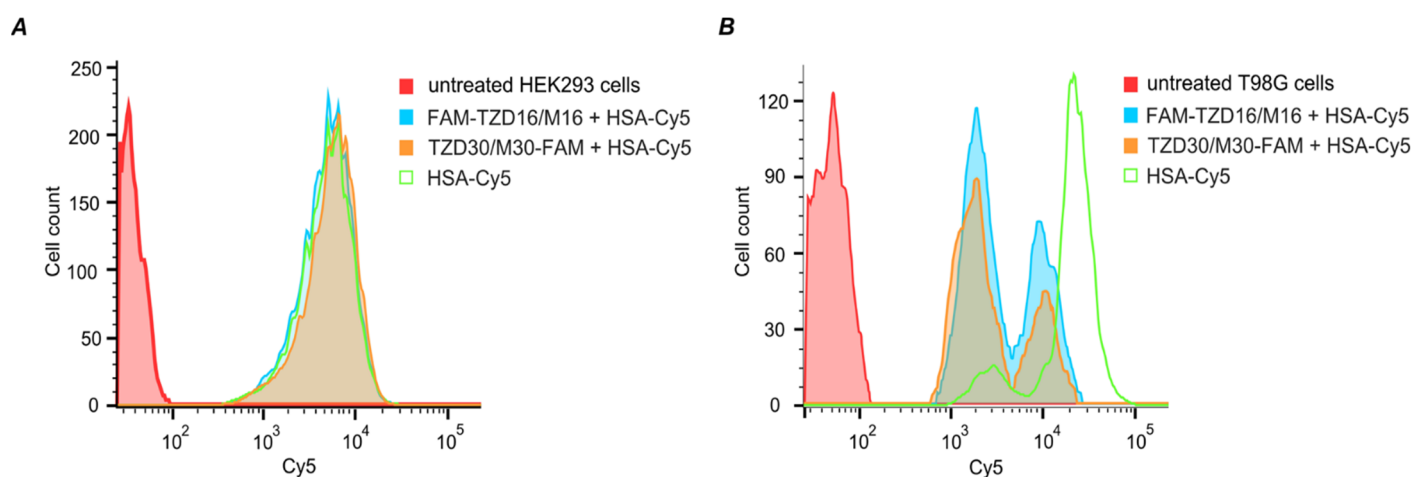

**Figure S12.** Penetration of HSA and its complexes with TZD16 and TZD30 oligomers into cells. HEK293 (A) and T98G (B) cells were incubated for 4 h with complexes containing 5 µM HSA and 5 µM oligomers.
